# Supplementary material for: Constructing a novel heterostructure of NiSe2/CoSe2 nanoparticles with boosted sodium storage properties for sodium-ion batteries
Source: Royal Society of Chemistry journal article supplement (doi:10.1039/d2ta04237a), 2022-01-01
Supplement: d2ta04237a1.pdf [file d2ta04237a1.pdf]

## **Constructing Novel Heterostructure of NiSe<sub>2</sub>/CoSe<sub>2</sub> Nanoparticles with Boosted Sodium Storage Properties for Sodium-Ion Batteries**

Hui Zheng<sup>a</sup>, Jianyi Wang<sup>a</sup>, Hongwei Li<sup>a</sup>, Shuqi Deng<sup>a</sup>, Yinze Zuo<sup>a, c, \*</sup>, Wei Yan<sup>b, \*</sup>, and JiuJun Zhang<sup>a, b, \*</sup>

<sup>a</sup>Institute for Sustainable Energy, College of Sciences, Shanghai University, Shanghai, 200444, P.R. China

<sup>b</sup>School of Materials Science & Engineering, Fuzhou University, Fuzhou, Fujian Province, 350108, P.R. China

<sup>c</sup>National Laboratory of Solid State Microstructures, Nanjing University, Nanjing 210093, PR. China

---

\*Corresponding authors.

Email addresses: [yinzezuo@shu.edu.cn](mailto:yinzezuo@shu.edu.cn) (Y. Zuo), [weiyang@fzu.edu.cn](mailto:weiyang@fzu.edu.cn) (W. Yan), [jiujun.zhang@i.shu.edu.cn](mailto:jiujun.zhang@i.shu.edu.cn) (J. Zhang).

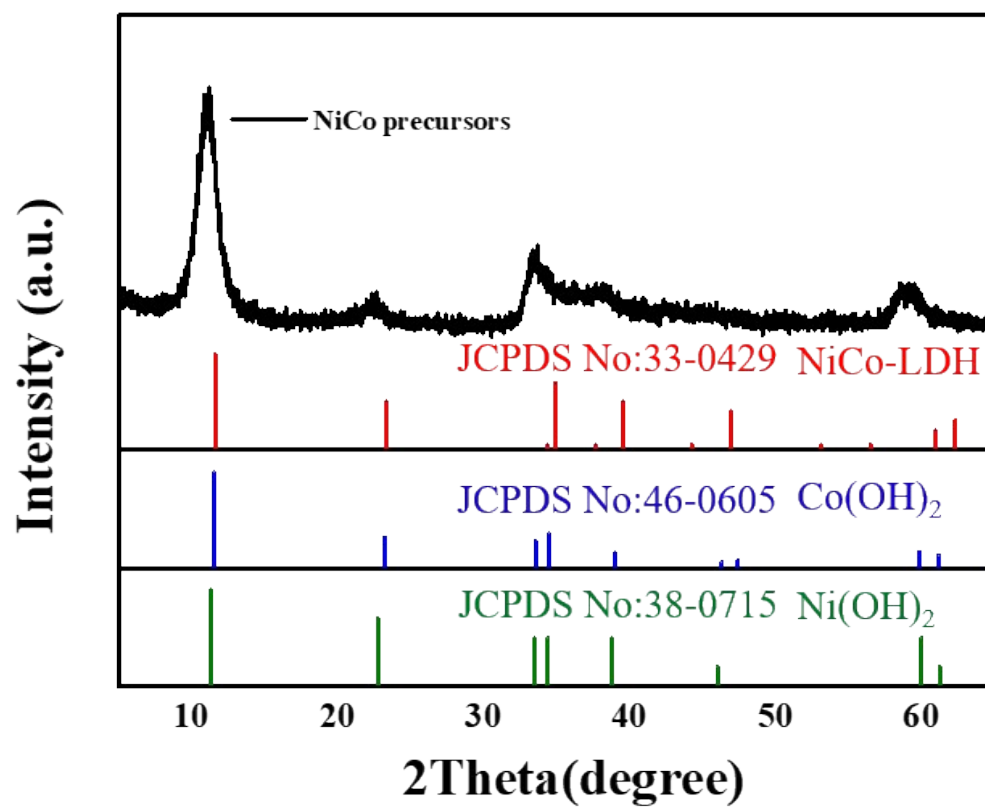

Fig. S1. XRD pattern of NiCo precursor.

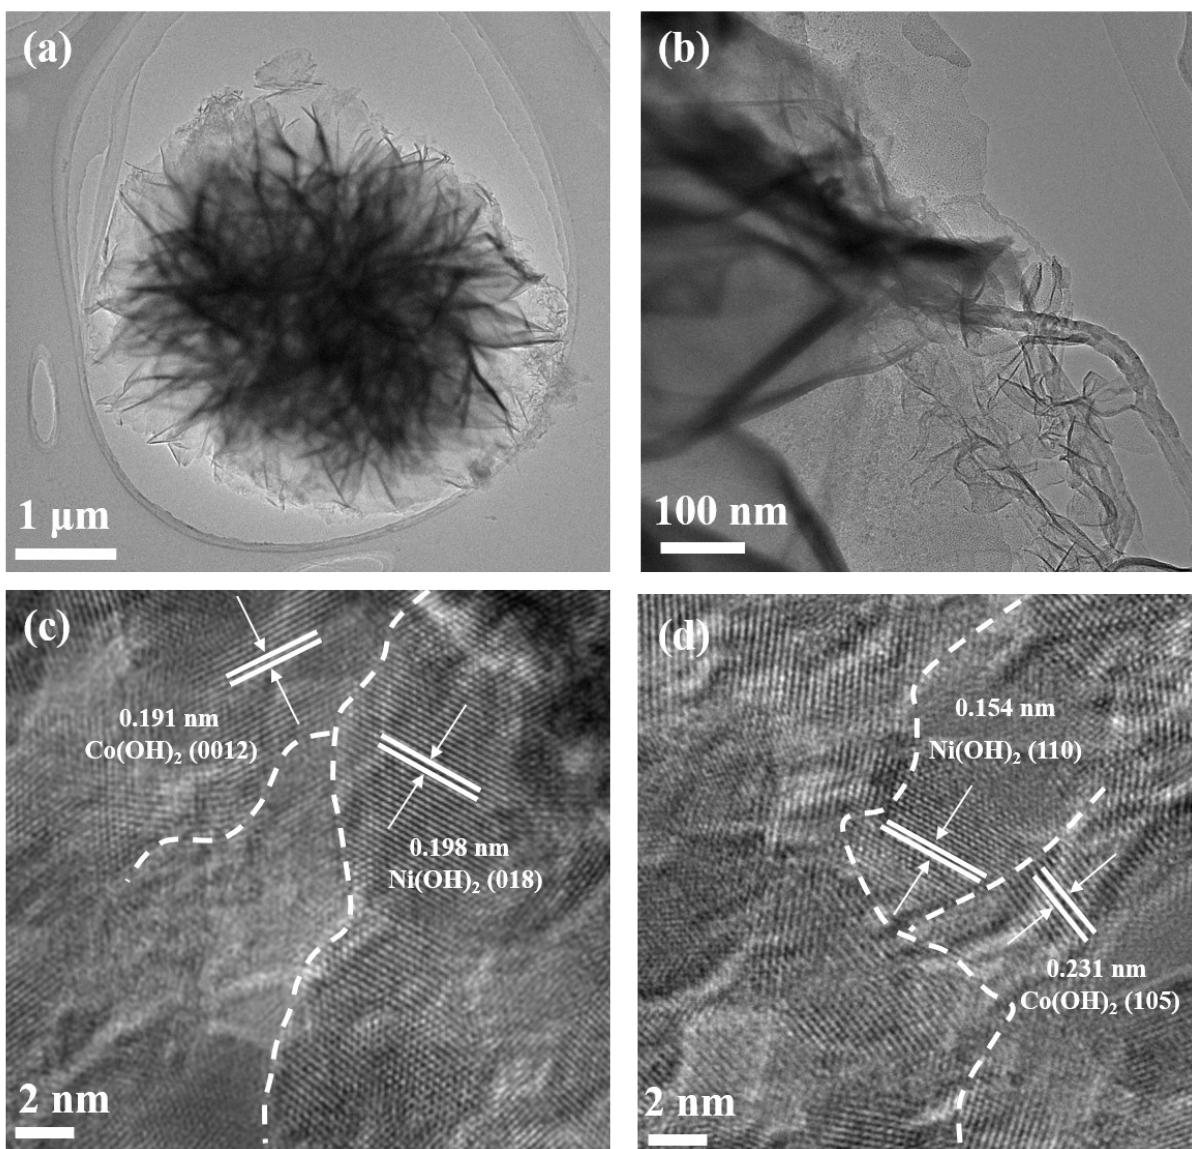

**Fig. S2.** (a-b) TEM and (c-d) HRTEM images of NiCo precursor.

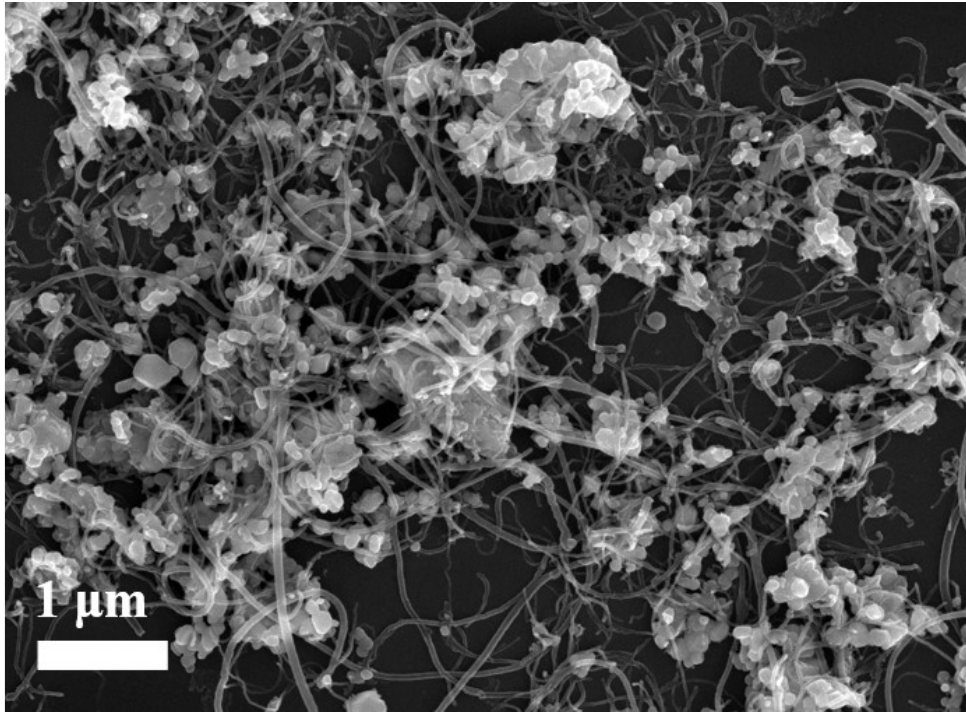

**Fig. S3.** SEM image of selenized NiCo precursor.

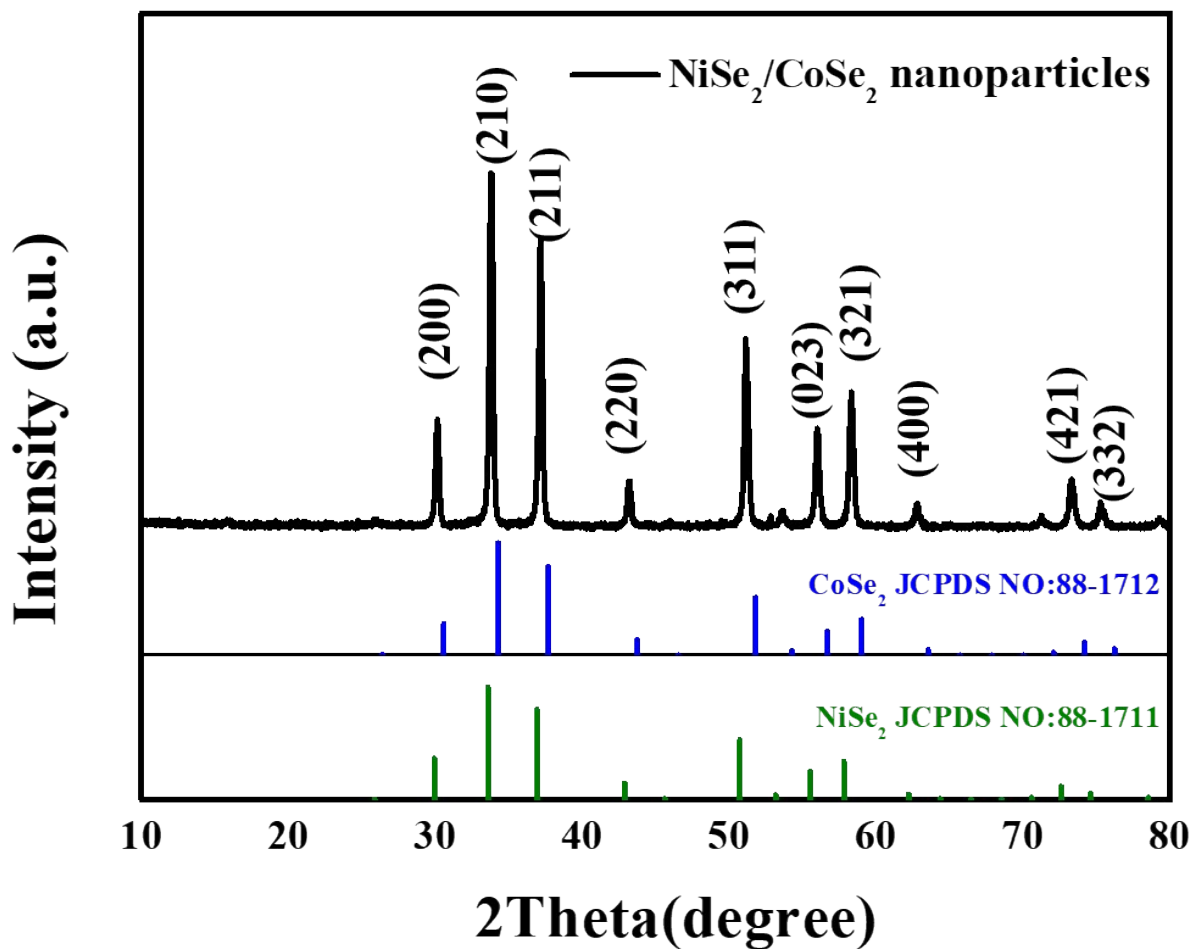

Fig. S4. XRD pattern of NiSe<sub>2</sub>/CoSe<sub>2</sub> nanoparticles.

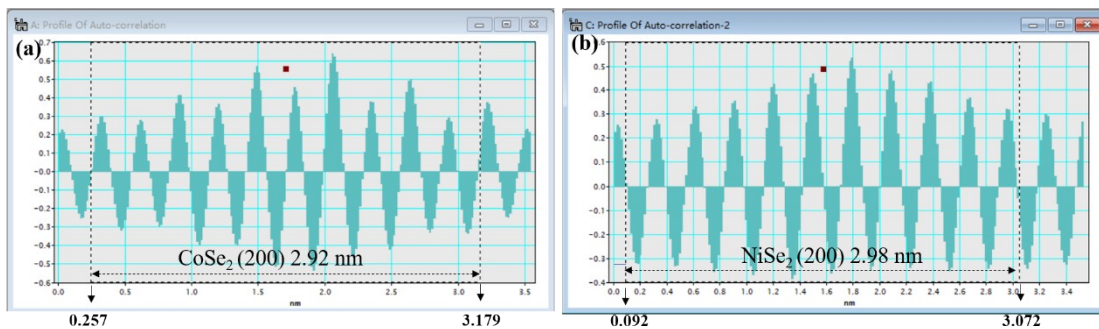

Fig. S5. Inverse FFT liner profiles of NiSe<sub>2</sub>/CoSe<sub>2</sub> nanoparticles.

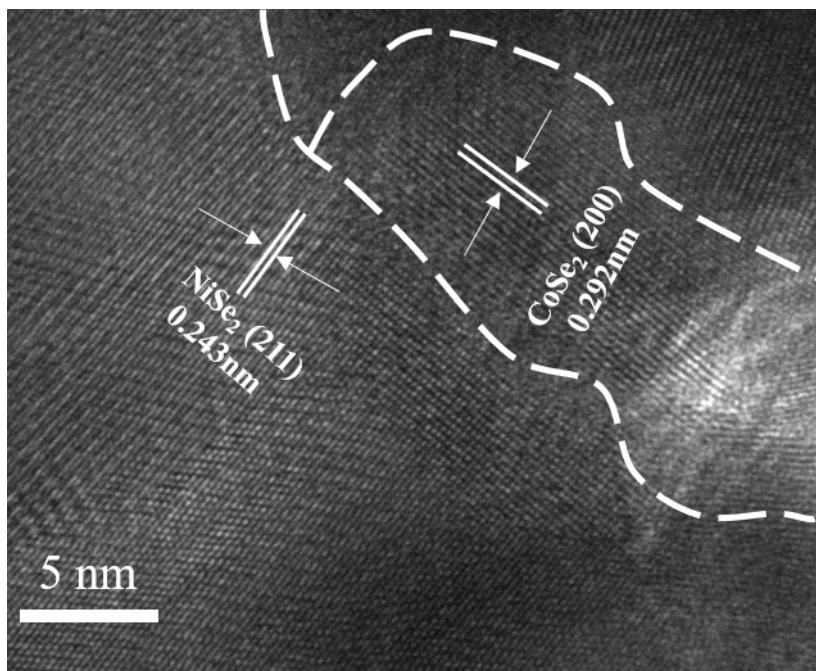

**Fig. S6.** HRTEM image of NiSe<sub>2</sub>/CoSe<sub>2</sub> nanoparticles.

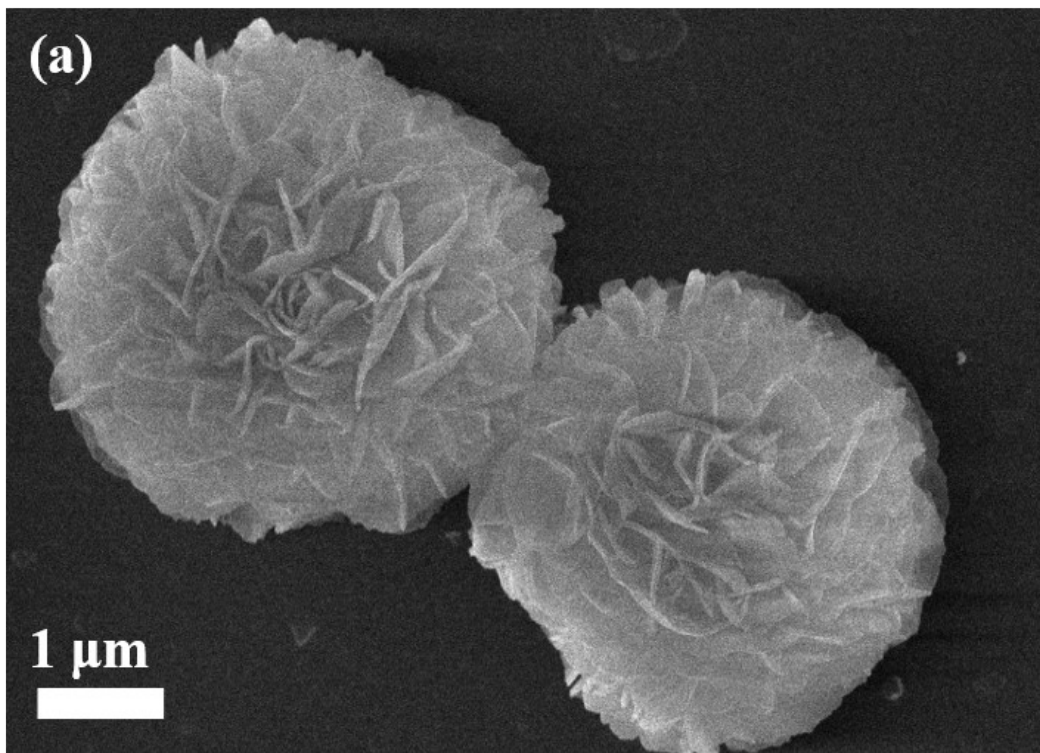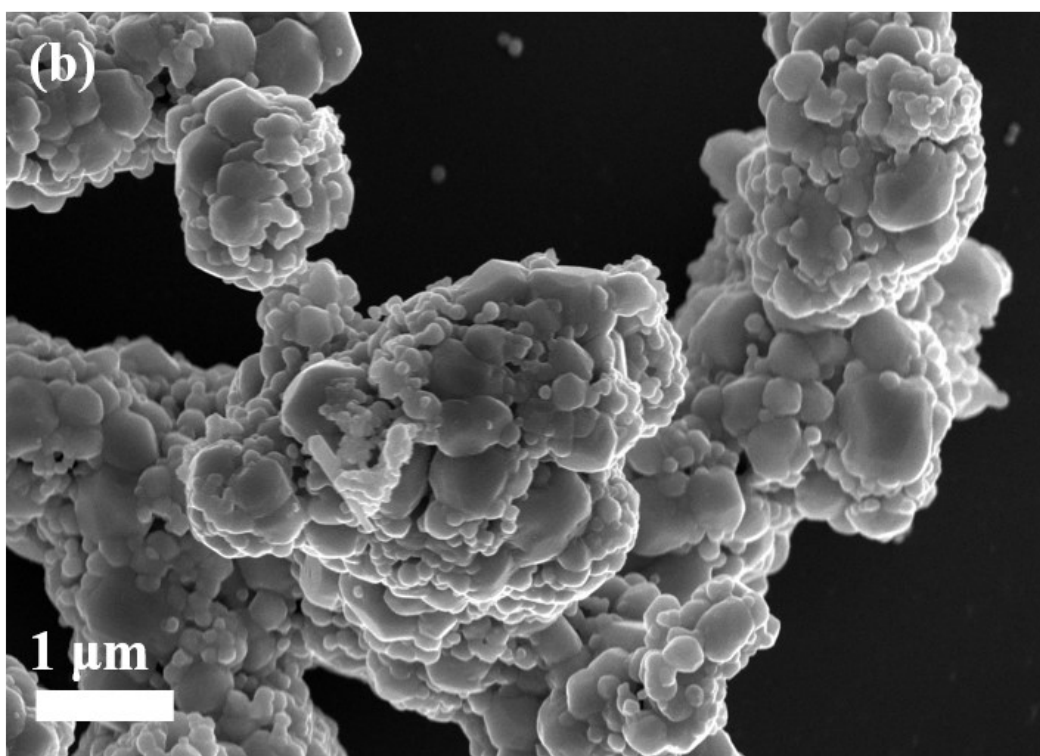

**Fig. S7.** (a) SEM image of NiCo precursor without MWCNTs; (b) SEM image of selenized NiCo precursor without MWCNTs.

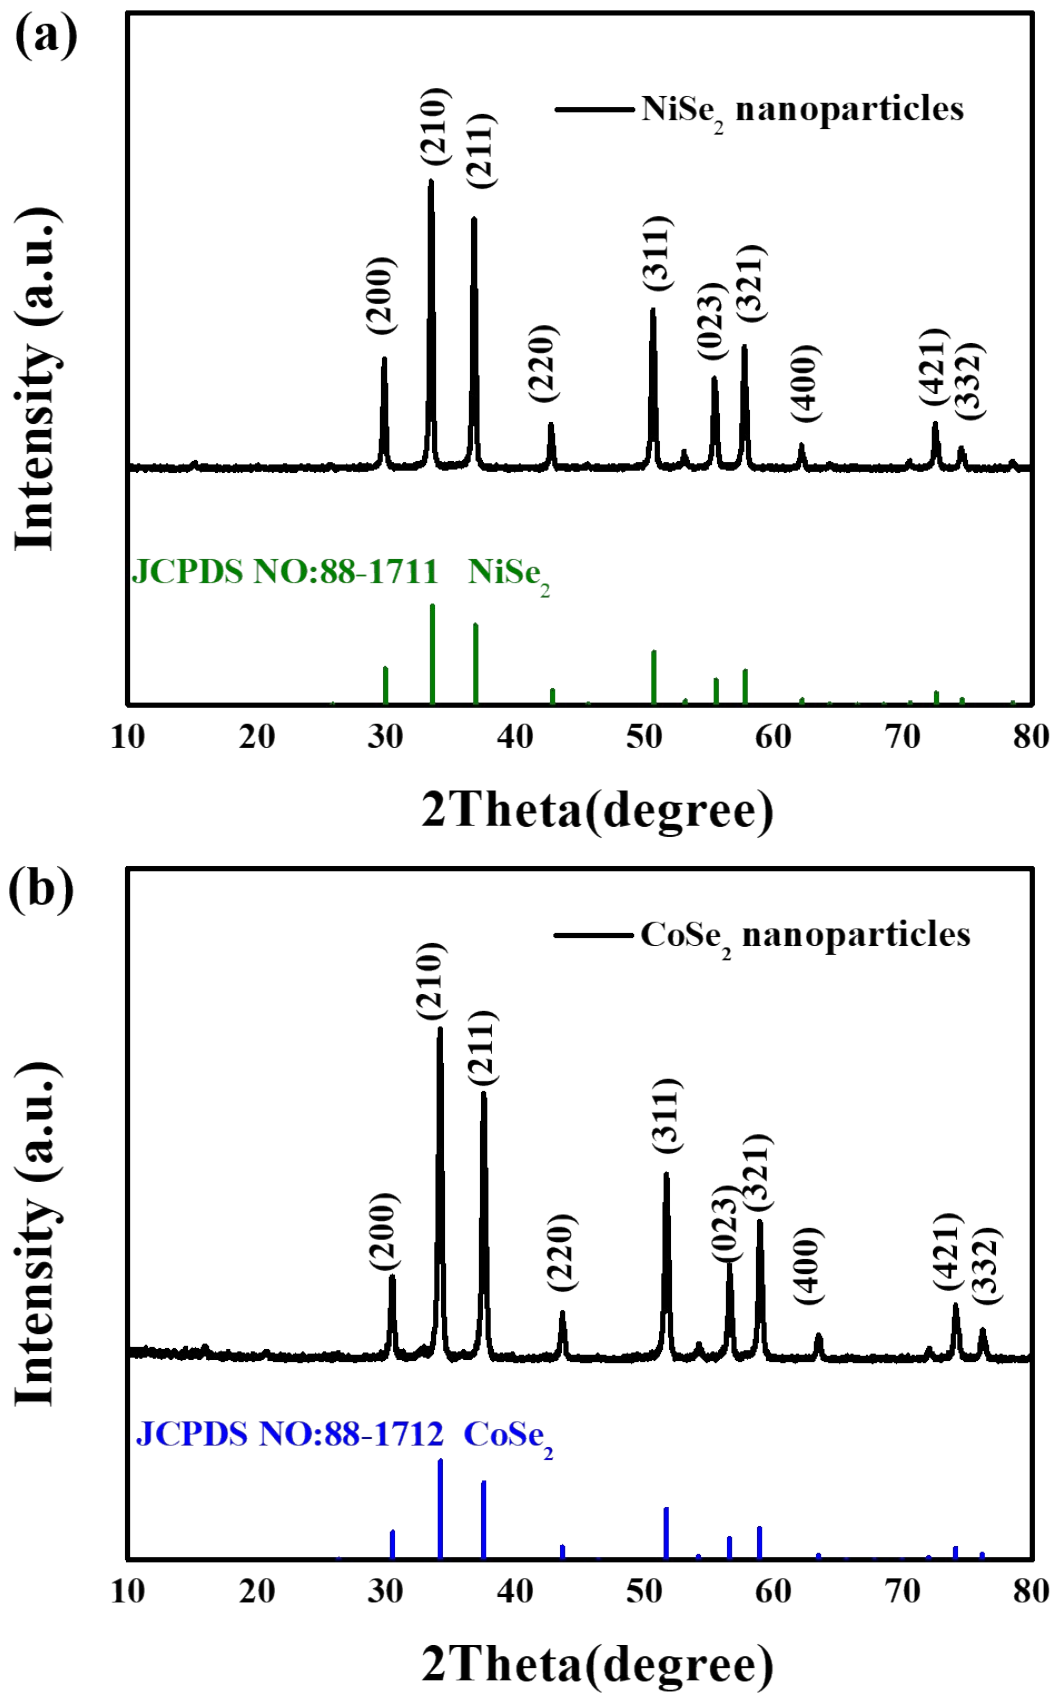

Fig. S8. XRD patterns of (a) NiSe<sub>2</sub> and (b) CoSe<sub>2</sub> nanoparticles.



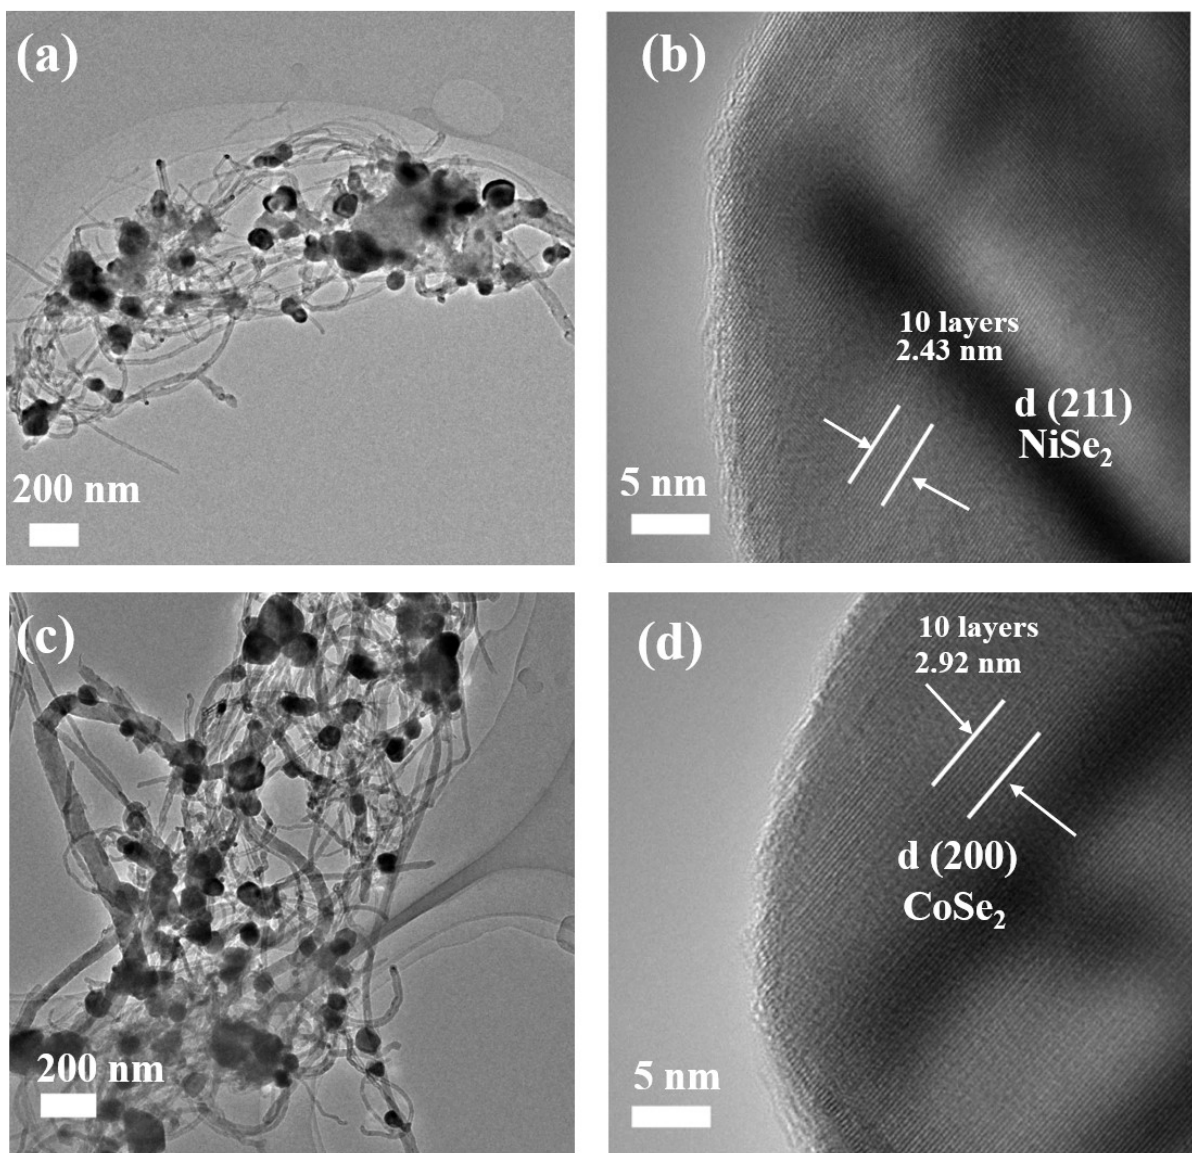

**Fig. S9.** (a) TEM and (b) HRTEM images of NiSe<sub>2</sub> nanoparticles; (c) TEM and (d) HRTEM images of CoSe<sub>2</sub> nanoparticles.

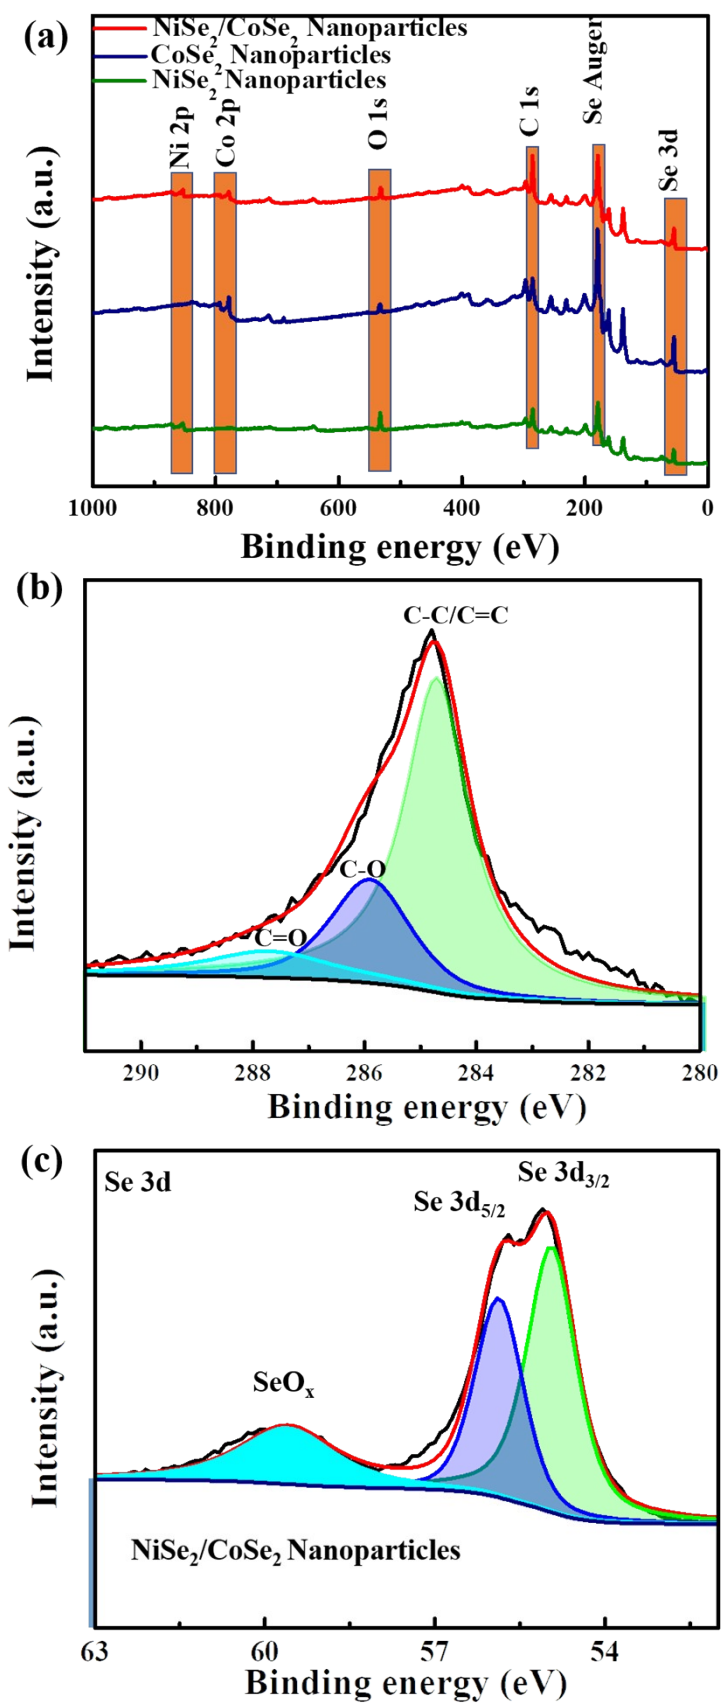

**Fig. S10.** (a) XPS survey spectra of NiSe<sub>2</sub>, CoSe<sub>2</sub> and NiSe<sub>2</sub>/CoSe<sub>2</sub> nanoparticles; (b-c) High-resolution C 1s and Se 3d XPS spectrum of NiSe<sub>2</sub>/CoSe<sub>2</sub> nanoparticles.

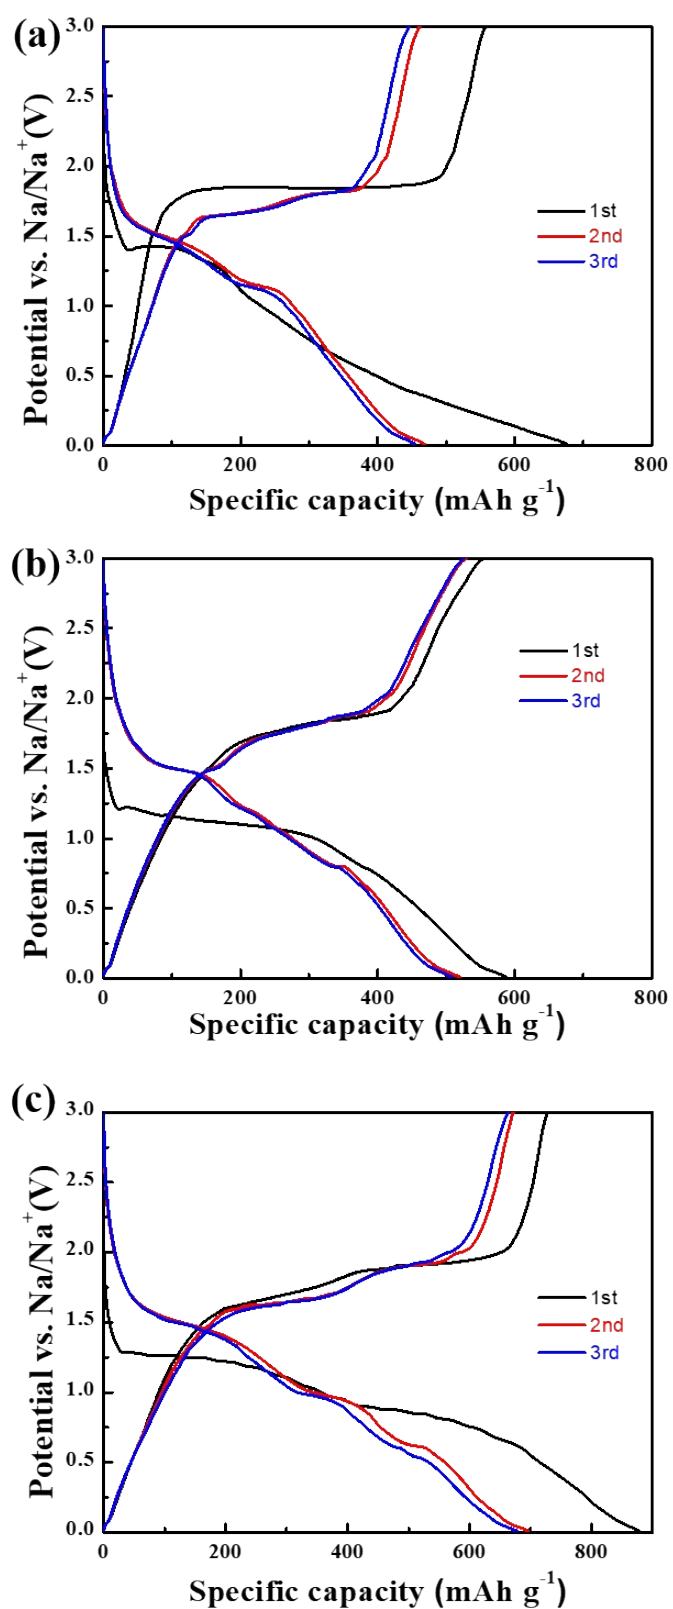

**Fig. S11.** The charge/discharge curves of the (a) NiSe<sub>2</sub>, (b) CoSe<sub>2</sub> and (c) NiSe<sub>2</sub>/CoSe<sub>2</sub> nanoparticles at 0.1 A g<sup>-1</sup>.

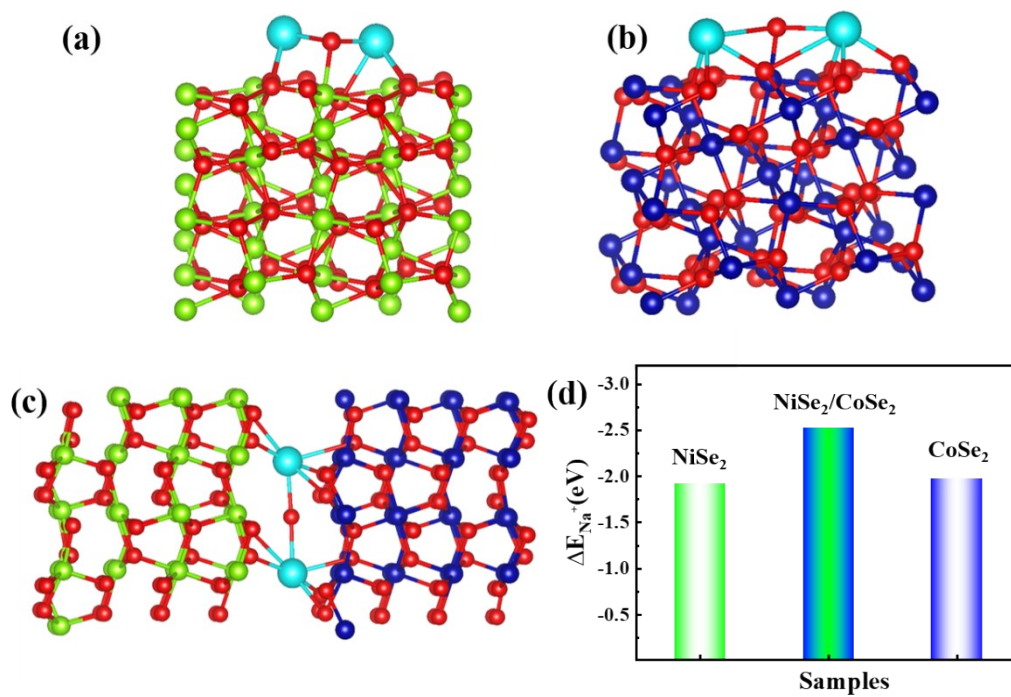

**Fig. S12.** The optimized structures of Na<sub>2</sub>Se adsorption on (a) NiSe<sub>2</sub>, (b) CoSe<sub>2</sub> and (c) NiSe<sub>2</sub> (200)/CoSe<sub>2</sub> (200); (d) The adsorption energies of Na<sub>2</sub>Se on NiSe<sub>2</sub>, CoSe<sub>2</sub> and NiSe<sub>2</sub> (200)/CoSe<sub>2</sub> (200).

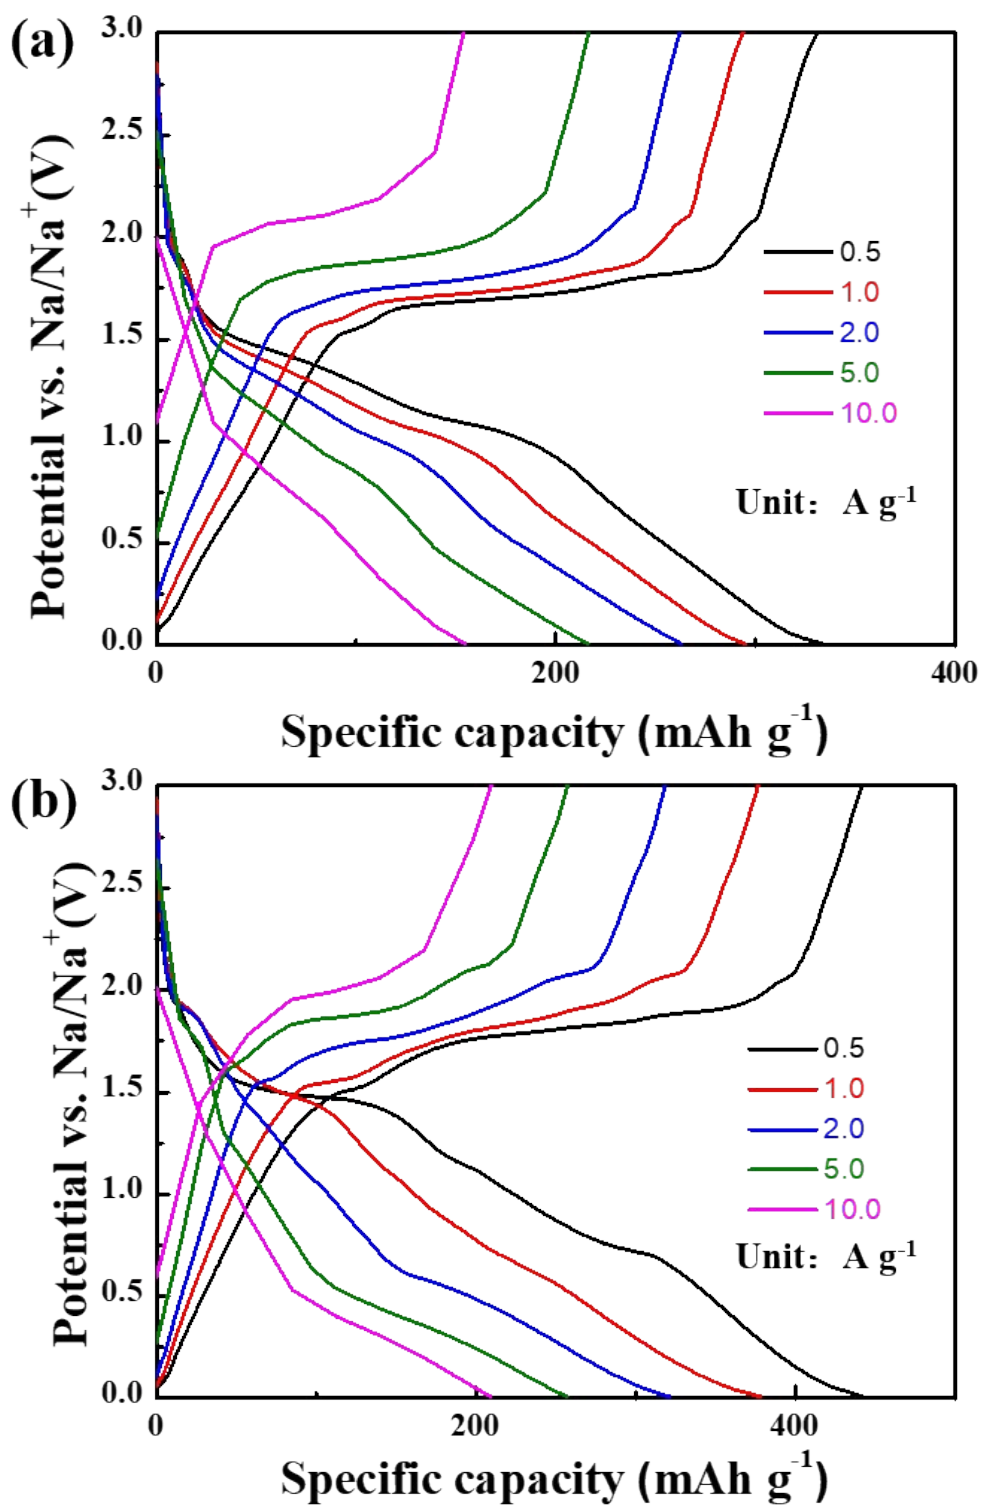

**Fig. S13.** The charge/discharge curves of (a) NiSe<sub>2</sub> and (b) CoSe<sub>2</sub> nanoparticles at different current densities.

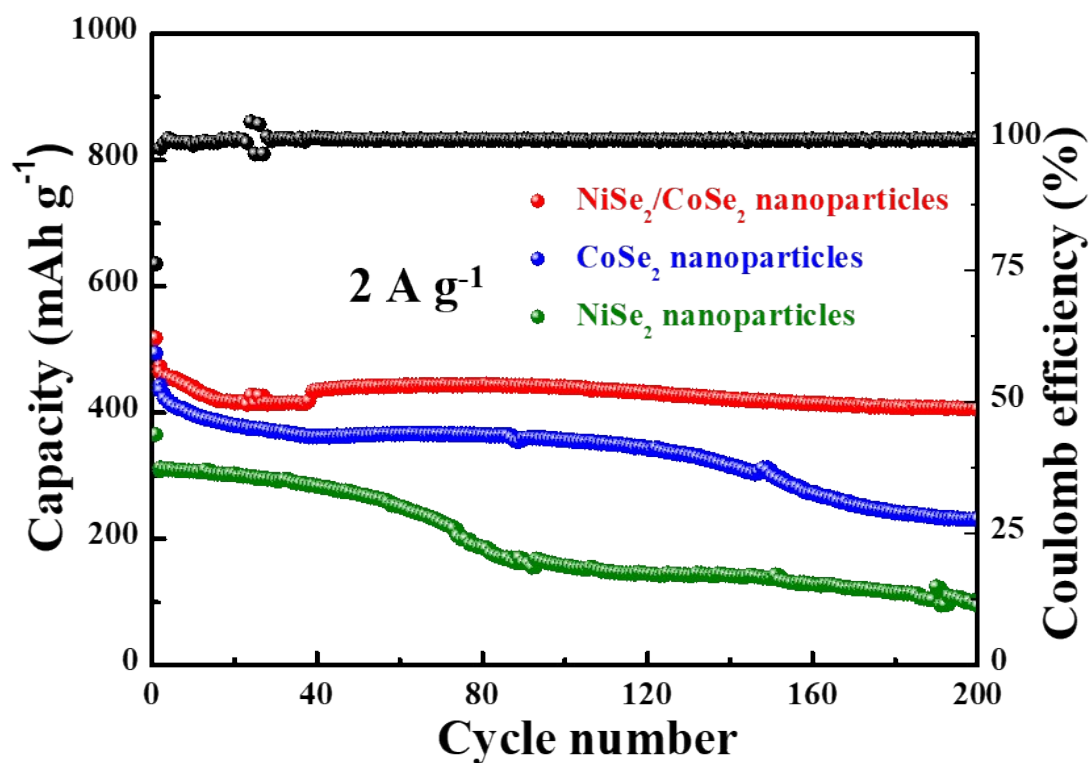

Fig. S14. The cycling performances of  $\text{NiSe}_2$ ,  $\text{CoSe}_2$  and  $\text{NiSe}_2/\text{CoSe}_2$  nanoparticles at  $2 \text{ A g}^{-1}$ .

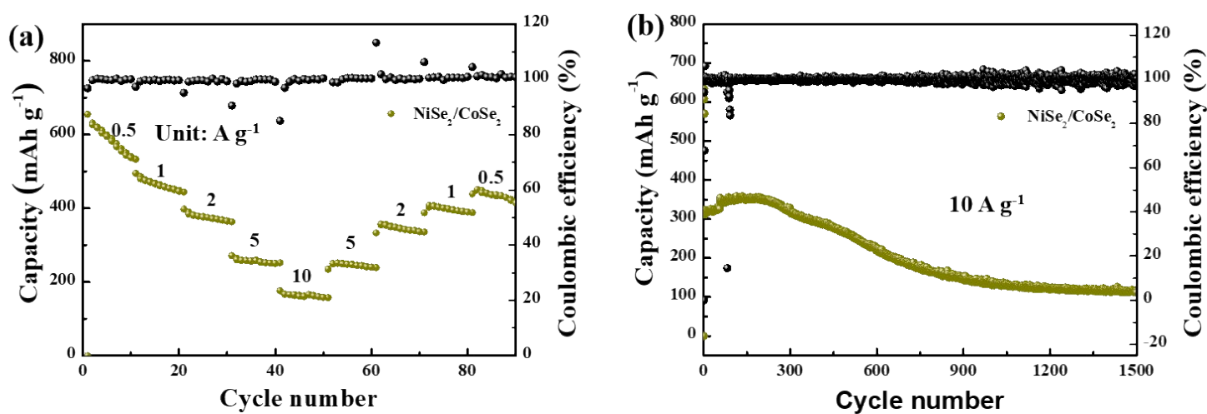

Fig. S15. (a) Rate performance and (b) cycling performance of selenized NiCo precursor without MWCNTs.

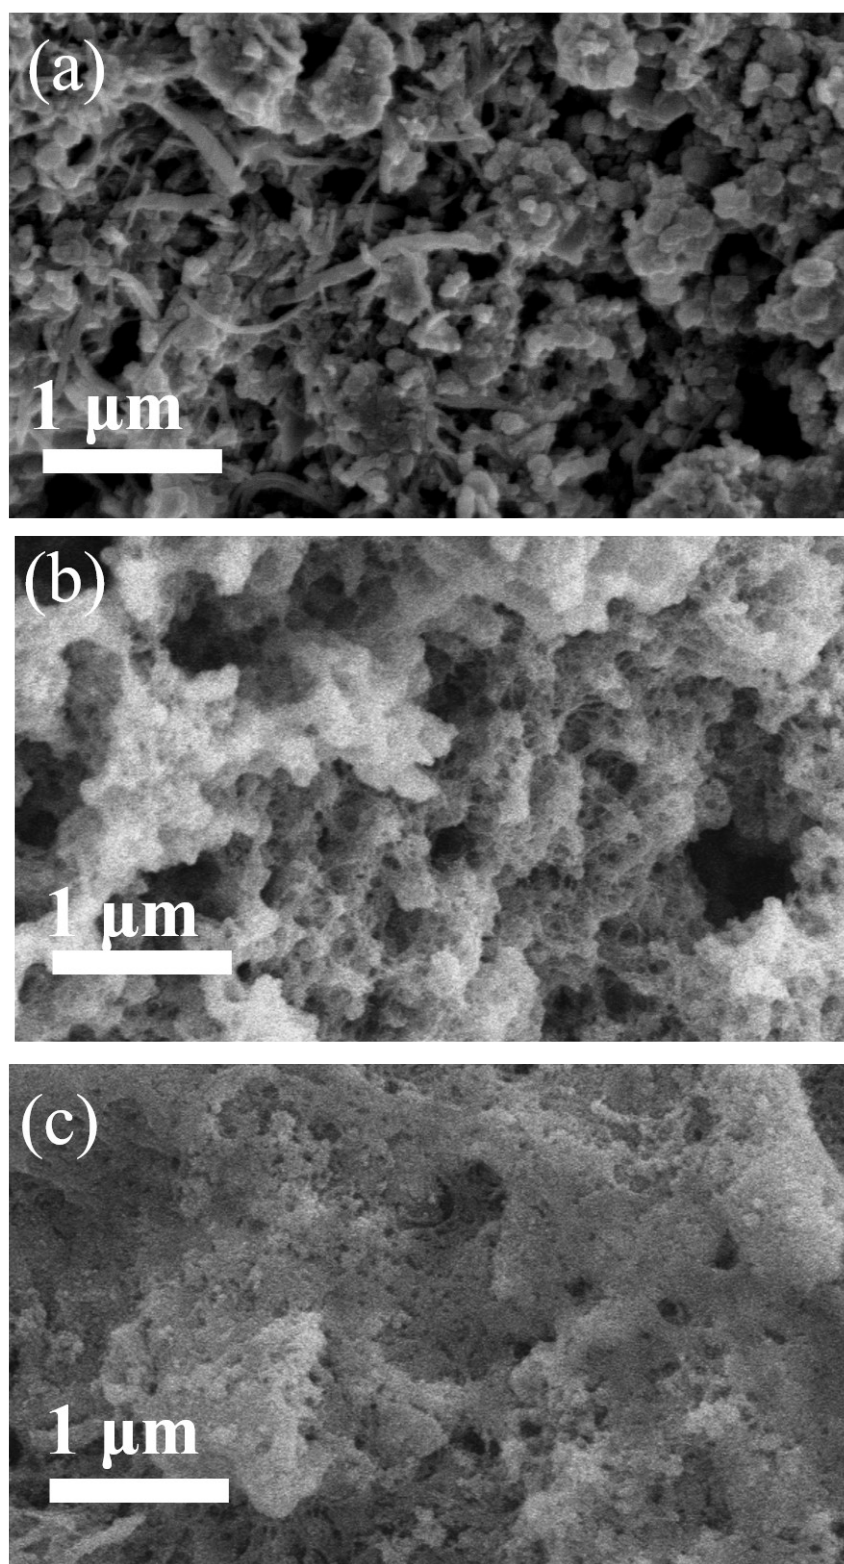

**Fig. S16.** SEM images of (a) NiSe<sub>2</sub>; (b) CoSe<sub>2</sub> and (c) NiSe<sub>2</sub>/CoSe<sub>2</sub> nanoparticles after 800 charge/discharge cycles at 10 A g<sup>-1</sup>.

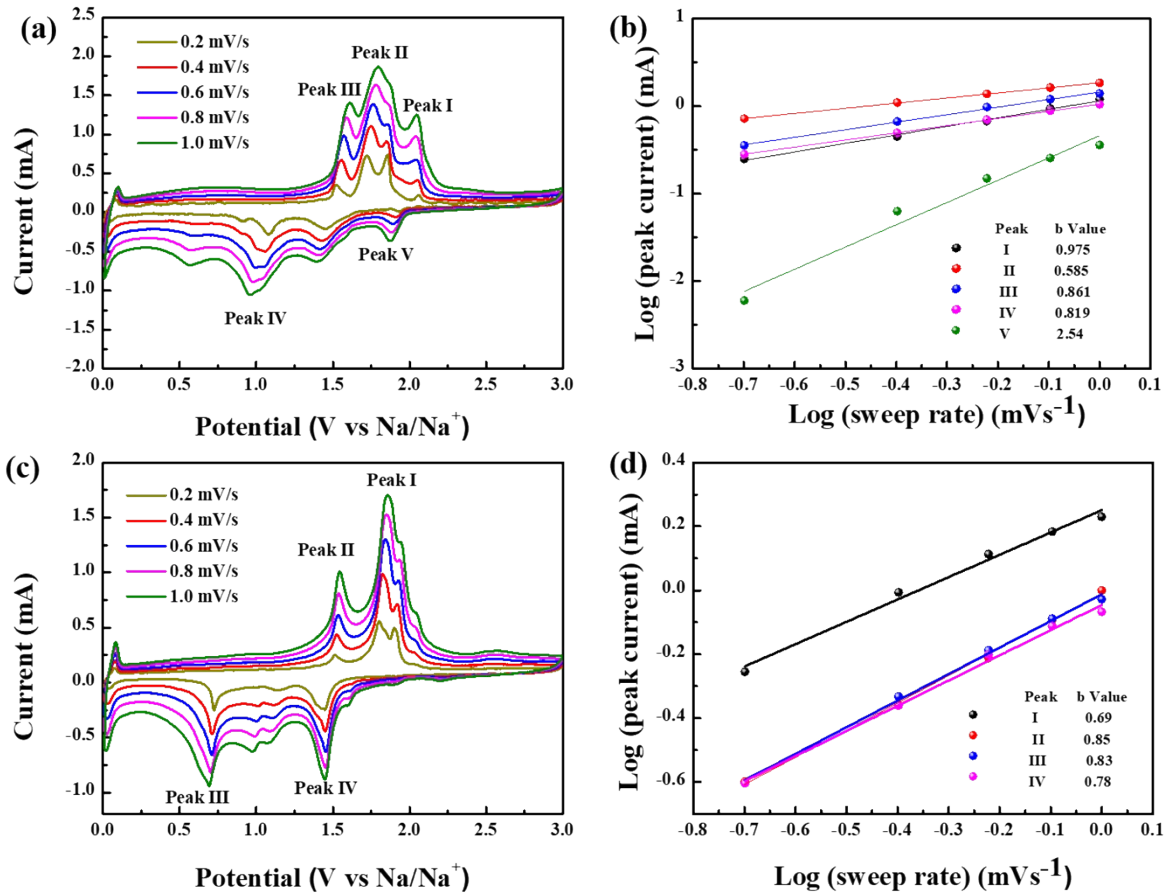

**Fig. S17.** (a) CV curves of NiSe<sub>2</sub> nanoparticles at different scan rates; (b) The b value after fitting at three specific redox peaks for NiSe<sub>2</sub> nanoparticles electrode; (c) CV curves of CoSe<sub>2</sub> nanoparticles at different scan rates; (d) The b value after fitting at three specific redox peaks for CoSe<sub>2</sub> nanoparticles electrode.



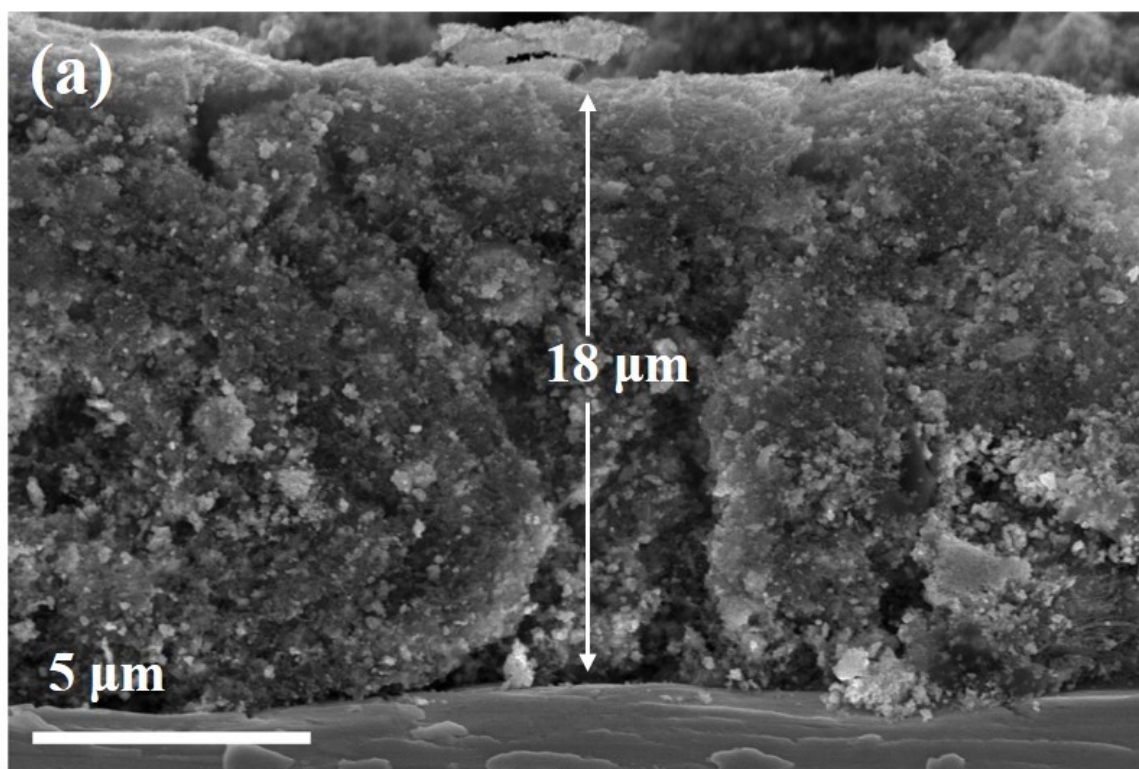

**Fig. S18.** The thickness of NiSe<sub>2</sub>/CoSe<sub>2</sub> nanoparticles composite on the copper foil.

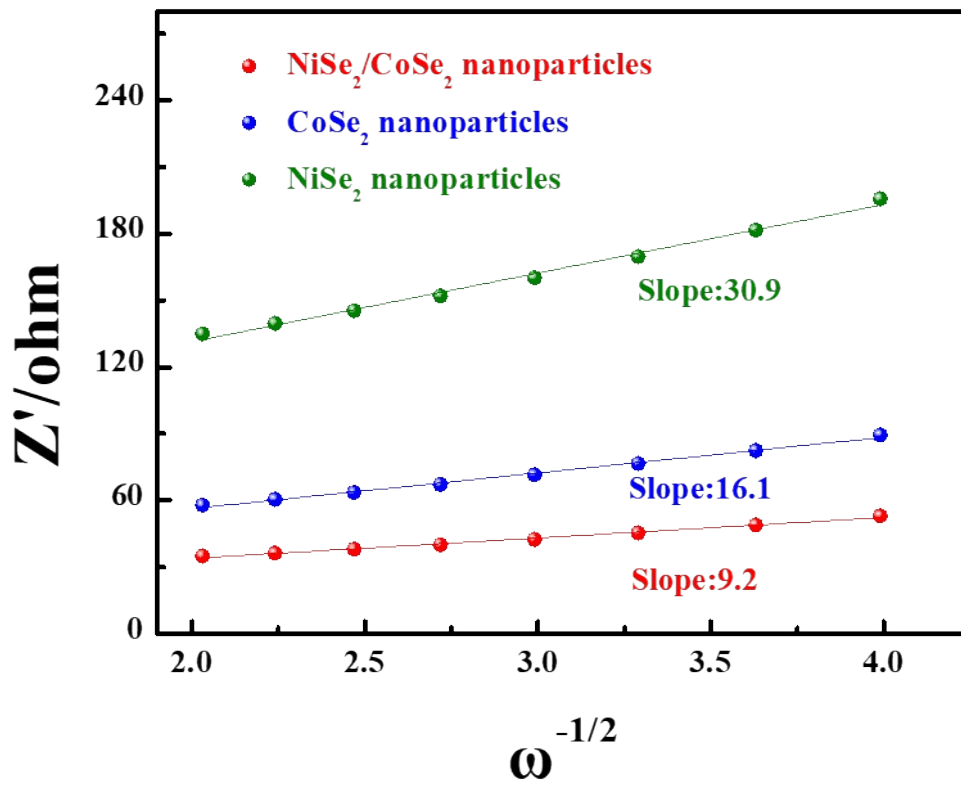

Fig. S19. The fitting lines between  $Z'$  and  $\omega^{-1/2}$  for three electrodes.

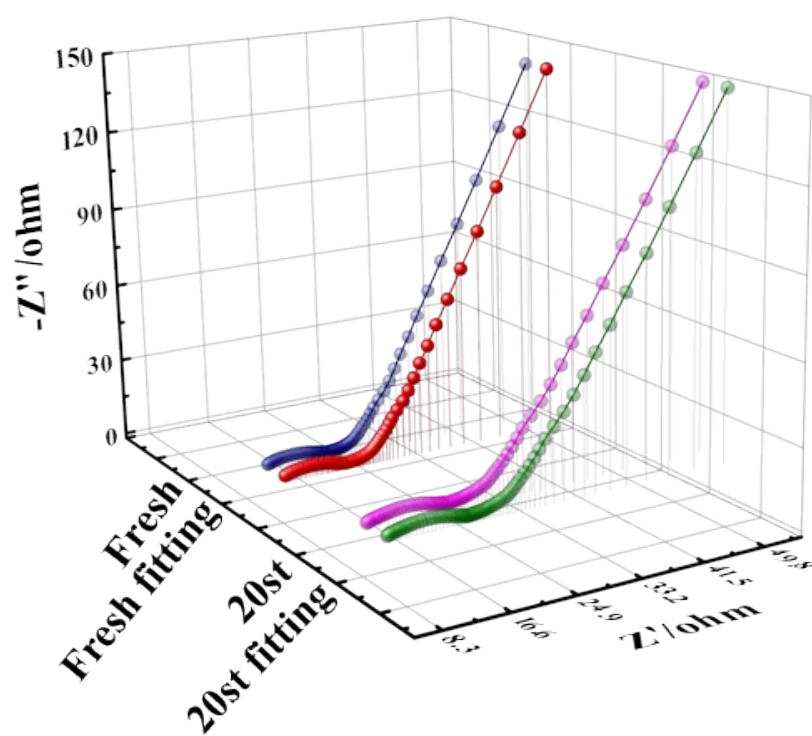

Fig. S20. the fitting EIS curves of NiSe<sub>2</sub>/CoSe<sub>2</sub> NPs before and after cycling.

**Table S1.** The atomic ratio of NiSe<sub>2</sub>/CoSe<sub>2</sub> nanoparticles

| Measurements | Atomic ratio                                       |
|--------------|----------------------------------------------------|
|              | NiSe <sub>2</sub> /CoSe <sub>2</sub> nanoparticles |
| ICP          | Ni: Co: Se =1:1:4                                  |

**Table S2.** The cycling performance comparisons of NiSe<sub>2</sub>/CoSe<sub>2</sub> Nanoparticles with other with previously reported TMSe.

| Materials                                                             | Current Density<br>(A g <sup>-1</sup> ) | Specific Capacity<br>(mA h g <sup>-1</sup> ) | Cycle<br>number | Ref.      |
|-----------------------------------------------------------------------|-----------------------------------------|----------------------------------------------|-----------------|-----------|
| CoSe <sub>2</sub> -CNS                                                | 10                                      | 250                                          | 2000            | 1         |
| 3DOHP ZnSe@N,C                                                        | 10                                      | 233.1                                        | 800             | 2         |
| NF <sub>11</sub> S/C                                                  | 8                                       | 208.8                                        | 2000            | 3         |
| Ni <sub>x</sub> Co <sub>1-x</sub> Se <sub>2</sub>                     | 10                                      | 324.5                                        | 675             | 4         |
| In <sub>2</sub> Se <sub>3</sub> -CoIn <sub>2</sub> -CoSe <sub>2</sub> | 10                                      | 205.5                                        | 2000            | 5         |
| NiSe <sub>2</sub> /CoSe <sub>2</sub> nanoparticles                    | 10                                      | 296.4                                        | 1500            | This work |

**Table S3.** Fitting parameters of sodium ion batteries of electrodes at the fresh state

| Samples                                            | $R_s$ ( $\Omega$ ) | $R_{ct}$ ( $\Omega$ ) | $\sigma$ ( $\Omega \text{ cm}^2 \cdot \text{s}^{-1/2}$ ) | $D_{Na^+}$ ( $\text{cm}^2 \text{ s}^{-1}$ ) |
|----------------------------------------------------|--------------------|-----------------------|----------------------------------------------------------|---------------------------------------------|
| NiSe <sub>2</sub> nanoparticles                    | 17.4               | 77.2                  | 30.9                                                     | $1.1 \times 10^{-11}$                       |
| CoSe <sub>2</sub> nanoparticles                    | 14.6               | 20.1                  | 16.1                                                     | $4.2 \times 10^{-11}$                       |
| NiSe <sub>2</sub> /CoSe <sub>2</sub> nanoparticles | 14.1               | 8.6                   | 9.2                                                      | $1.3 \times 10^{-10}$                       |

The diffusion coefficients of the Na<sup>+</sup> ions ( $D_{Na^+}$ ) of the three electrodes can be calculated from the following equations:

$$Z' = R_s + R_{ct} + \sigma \omega^{-1/2} \quad (\text{S1})$$

$$D = R^2 T^2 / 2 A^2 n^4 F^4 C^2 \sigma^2 \quad (\text{S2})$$

## References

1. B. Wang, X. Miao, H. Dong, X. Ma, J. Wu, Y. Cheng, H. Geng and C. C. Li, *J. Mater. Chem. A*, 2021, **9**, 14582-14592.
2. T. Hou, Z. Jia, B. Wang, H. Li, X. Liu, Q. Chi and G. Wu, *Chem. Eng. J.*, 2021, **422**, 130079.
3. Z. Kong, L. Wang, S. Iqbal, B. Zhang, B. Wang, J. Dou, F. Wang, Y. Qian, M. Zhang and L. Xu, *Small*, 2022, **18**, e2107252.
4. Y. He, M. Luo, C. Dong, X. Ding, C. Yin, A. Nie, Y. Chen, Y. Qian and L. Xu, *J. Mater. Chem. A*, 2019, **7**, 3933-3940.
5. S. Xiao, X. Li, W. Zhang, Y. Xiang, T. Li, X. Niu, J. S. Chen and Q. Yan, *ACS Nano*, 2021, 15(8), 13307–13318.
